# Supplementary material for: Learning through service user involvement in allied health education: A qualitative investigation of the student experience
Source: Research Square preprint supplement (doi:10.21203/rs.3.rs-7129987/v1), 2025-10-06
Supplement: Supplementary file 2 [file ffb86b86214ffdfce96e9707.docx]

# Online Resource A.

# Semi-structured interview schedule.

| Question |
| --- |
| Can you please describe your experience of service users contributing to your programme of study? |
| How satisfied were you with the level of service user involvement in your healthcare studies?  What worked well?  Was there anything that didn’t work well? |
| Do you think service user involvement contributed to your learning? If so, how? If not, why not? |
| Did service user involvement change your practice as a student/future clinician? If so, how? |
| Were there any benefits of service user involvement in healthcare education for you? Do you see any benefit to the patient? |
| What do you see as potential barriers service user involvement in healthcare education? |
| Are there things that could be changed to improve service user involvement in healthcare education? |
| In what ways do you think service users should be involved in healthcare education? Prompts- refer to Towel’s Spectrum of Involvement. |
